# Supplementary material for: Galactinol synthase transcriptional profile in two genotypes of Coffea canephora with contrasting tolerance to drought
Source: PubMed Central journal article supplement — Genet Mol Biol. 2015 May 1;38(2):182–90. doi: 10.1590/S1415-475738220140171 (PMC4530651; doi:10.1590/s1415-475738220140171), 2015-05-01
Supplement: 1415-4757-gmb-38-2-182-suppl01.pdf [file 1415-4757-gmb-38-2-182-suppl01.pdf]

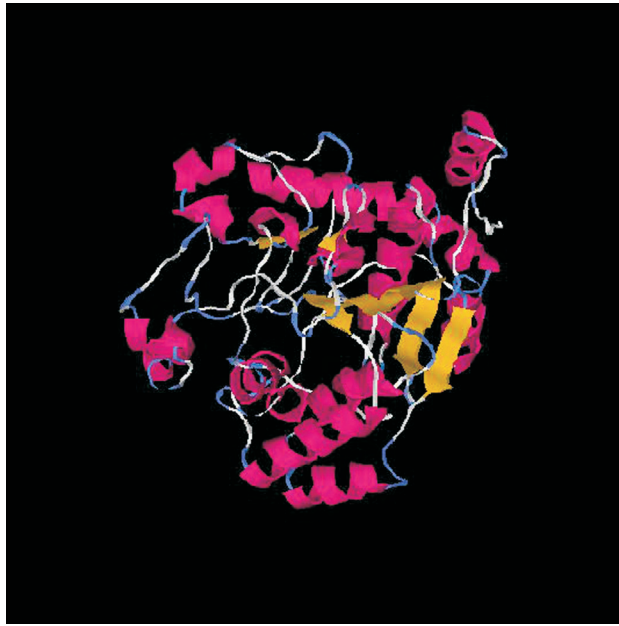

**Figure S1** - The predicted 3D structure of *CcGolSI* generated by the I-TASSER server (Roy *et al.*, 2010), using 1II0B as a template.
