# Supplementary material for: Galactinol synthase transcriptional profile in two genotypes of Coffea canephora with contrasting tolerance to drought
Source: PubMed Central journal article supplement — Genet Mol Biol. 2015 May 1;38(2):182–90. doi: 10.1590/S1415-475738220140171 (PMC4530651; doi:10.1590/s1415-475738220140171), 2015-05-01
Supplement: 1415-4757-gmb-38-2-182-suppl02.pdf [file 1415-4757-gmb-38-2-182-suppl02.pdf]

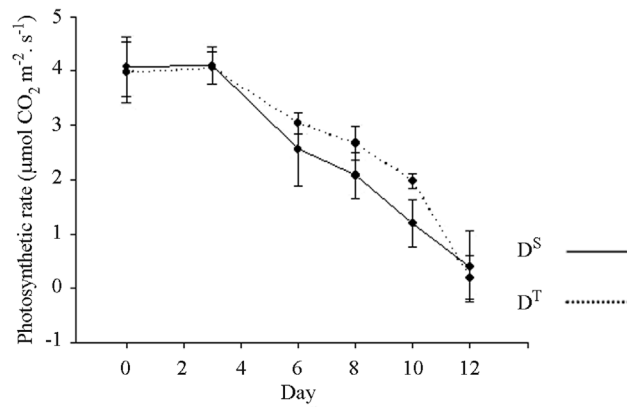

**Figure S2**- Photosynthetic rates of the two *C. canephora* genotypes after 12 days without irrigation. Dashed line indicates clone 14 (drought-tolerant – D<sup>T</sup>) and solid line indicates clone 109A (drought-susceptible – D<sup>S</sup>). Photosynthetic rates were quantified using a portable photosynthesis system (model LI-6200, LI-COR) with a one liter chamber, resulting in values expressed in μmol CO<sub>2</sub>/m<sup>2</sup>/s<sup>1</sup>. The points are the mean ± SEM (n = 3).
