# Supplementary material for: Galactinol synthase transcriptional profile in two genotypes of Coffea canephora with contrasting tolerance to drought
Source: PubMed Central journal article supplement — Genet Mol Biol. 2015 May 1;38(2):182–90. doi: 10.1590/S1415-475738220140171 (PMC4530651; doi:10.1590/s1415-475738220140171), 2015-05-01
Supplement: 1415-4757-gmb-38-2-182-suppl03.pdf [file 1415-4757-gmb-38-2-182-suppl03.pdf]

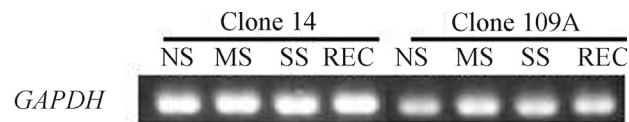

**Figure S3** - Semi-quantitative RT-PCR analysis of *CcGolSI* using cDNA from *C. canephora* clones D<sup>T</sup> (clone 14) and D<sup>S</sup> (clone 109A). The water deficit treatments were: non-stressed (NS;  $\pm$  -1.35 MPa), moderate stress (MS;  $\pm$  -2.35 MPa), severe stress (SS;  $\pm$  -4.3 MPa) and recovery (REC; 72 h following re-irrigation after severe stress); see Materials and Methods for details. The *GAPDH* gene was used as an internal control to normalize the expression level of the target gene (*CcGolSI*) between different treatments, as described by Cruz *et al.* (2009).
